# Supplementary material
Source: Copernicus journal article supplement (doi:10.5194/egqsj-43-29-1993)

Taf. 1: Pollendiagramm für die Humite im Bereich Brunselmeer/Neuburlage (HAUSCHILD & LÜTTIG).

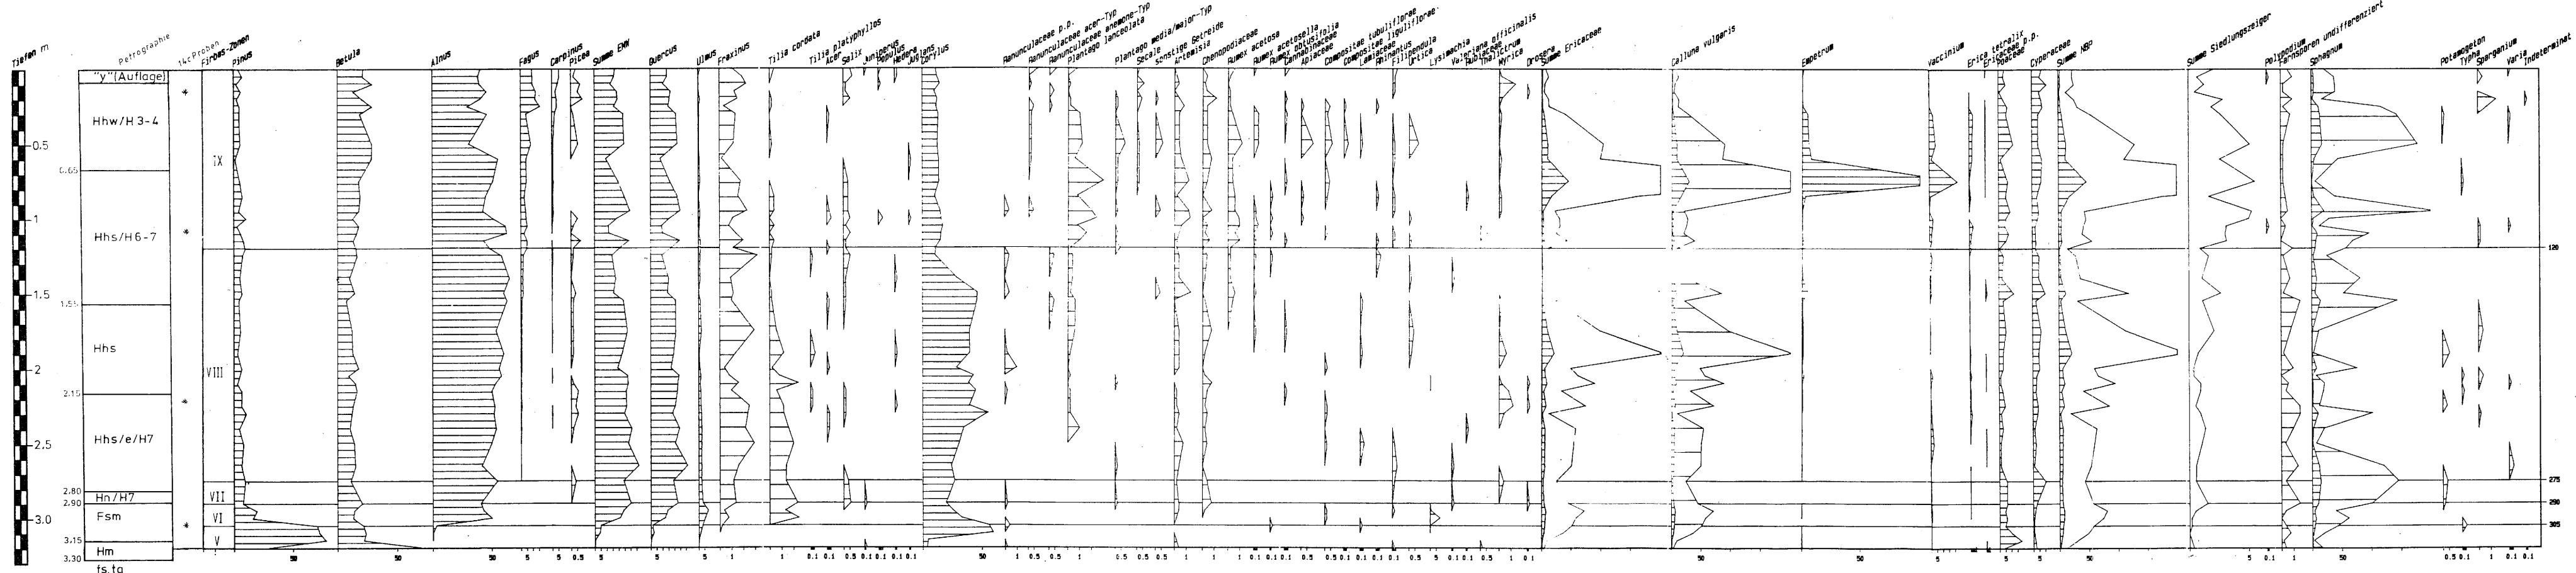

Supplement: Supplementary file 1 [file egqsj-43-29-1993-supplement.pdf]
